# Supplementary material for: Graphene Oxide-Based Nanostructured DNA Sensor
Source: PubMed Central journal article supplement (PMC6627418; doi:10.3390/bios9020074), 2019-05-30
Supplement: biosensors-09-00074-s001.pdf [file biosensors-09-00074-s001.pdf]

# Graphene Oxide-Based Nanostructured DNA Sensor

Aditya Balaji <sup>1</sup>, Songlin Yang <sup>2</sup>, Jeslyn Wang <sup>2</sup> and Jin Zhang <sup>1,2,\*</sup>

<sup>1</sup> Department of Biomedical Engineering, University of Western Ontario, London, ON N6A 5B9, Canada; abalaji2@uwo.ca

<sup>2</sup> Department of Chemical and Biochemical Engineering, University of Western Ontario, London, ON N6A 5B9, Canada; syang368@uwo.ca (S.Y.); Jeslyn.Wang2019@gmail.com (J.W.)

\* Correspondence: jzhang@eng.uwo.ca; Tel.: +1-519-661-2111

The Standard curve of DNA concentration was measured by using UV-Vis spectrometer

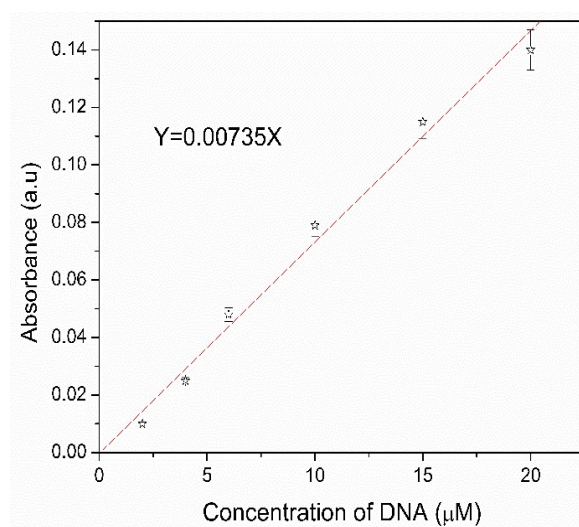

**Figure S1.** UV absorbance of DNA with different concentrations in aqueous solution.
